# Supplementary material for: Genetic diversity and population structure of Tenacibaculum maritimum, a serious bacterial pathogen of marine fish: from genome comparisons to high throughput MALDI-TOF typing
Source: Springer Nature journal article supplement (doi:10.1186/s13567-020-00782-0), 2020-05-07

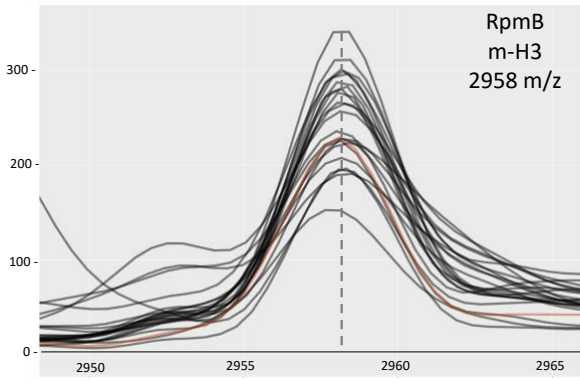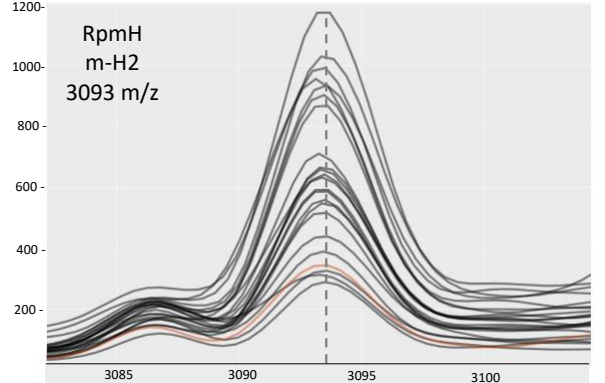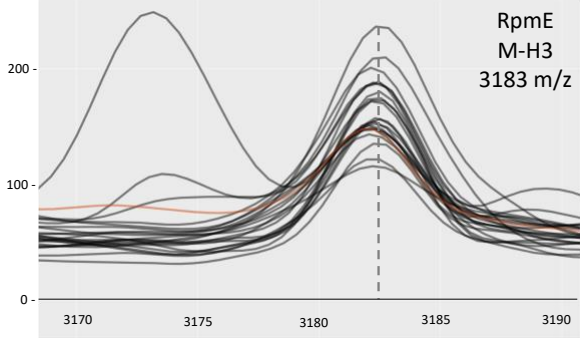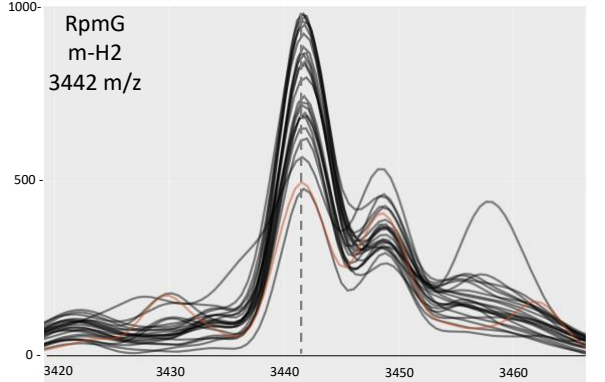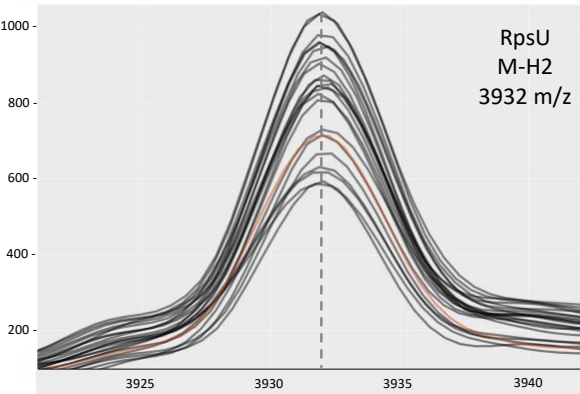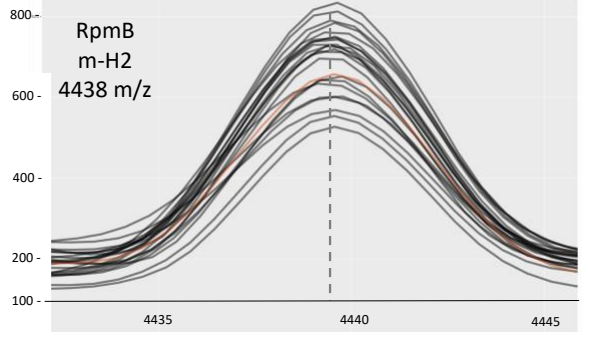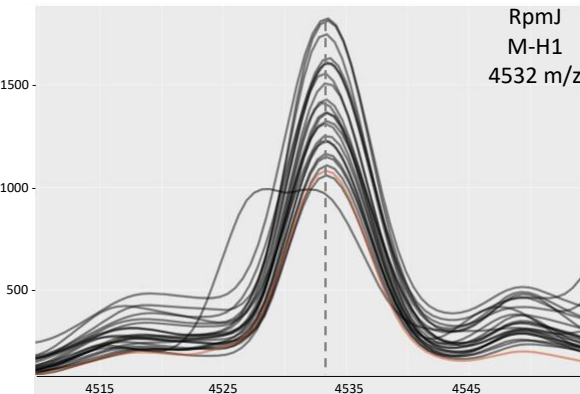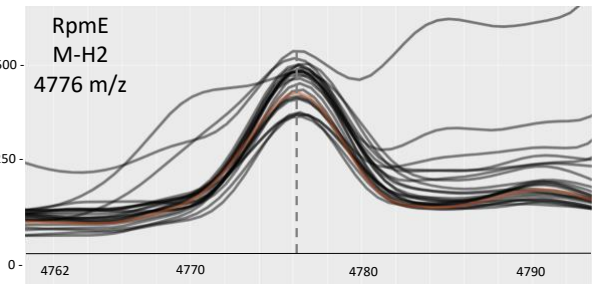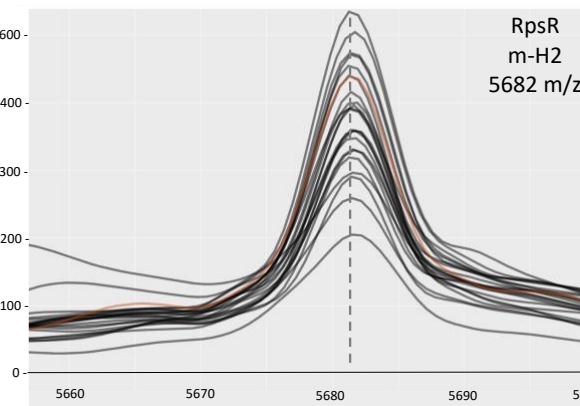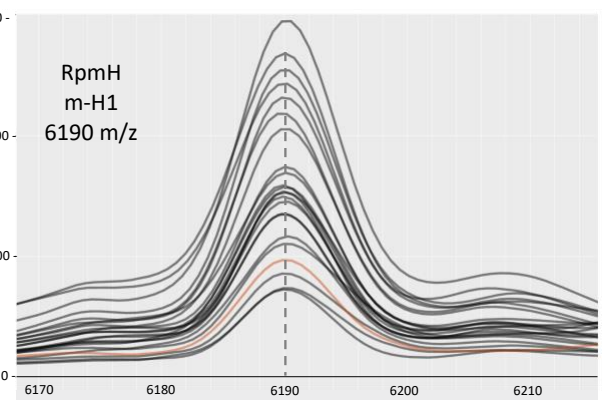

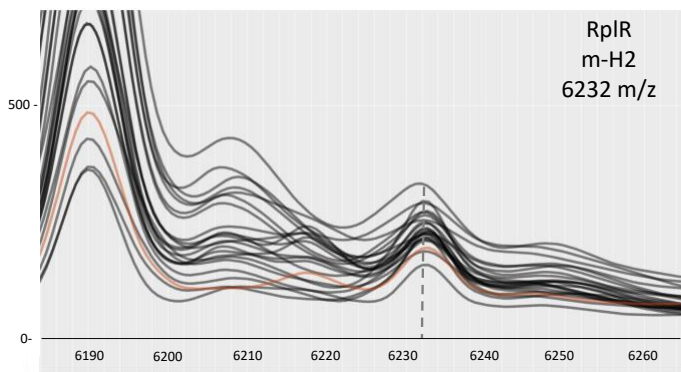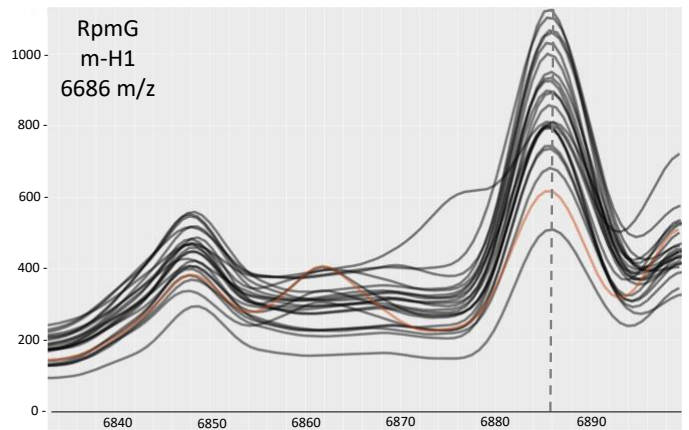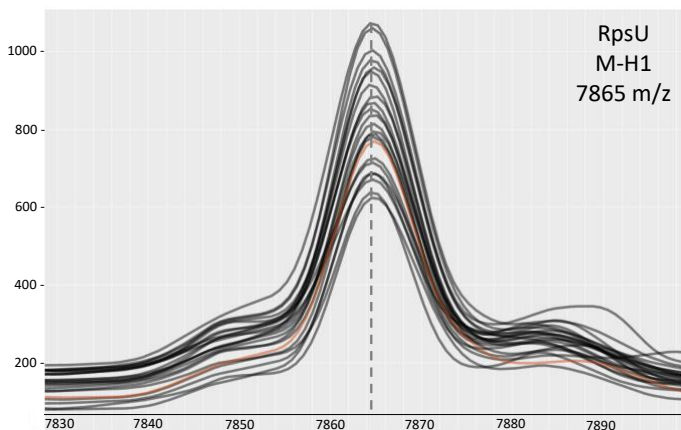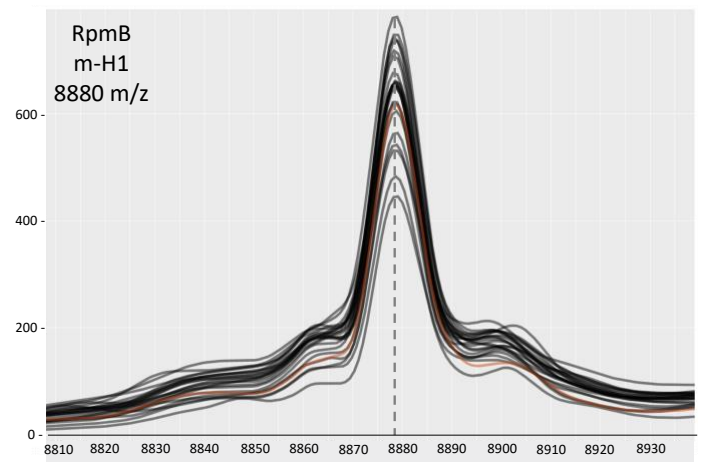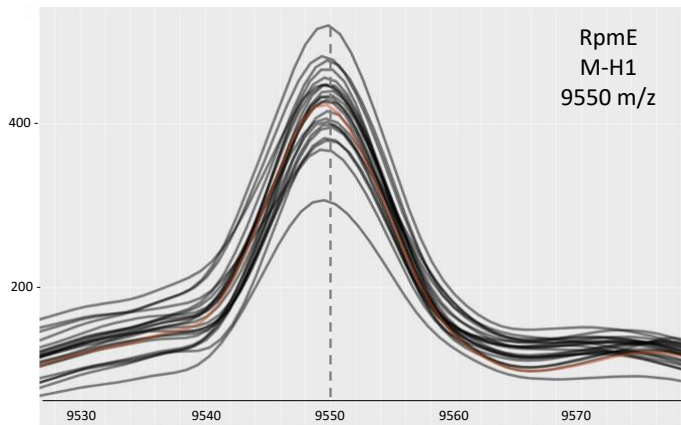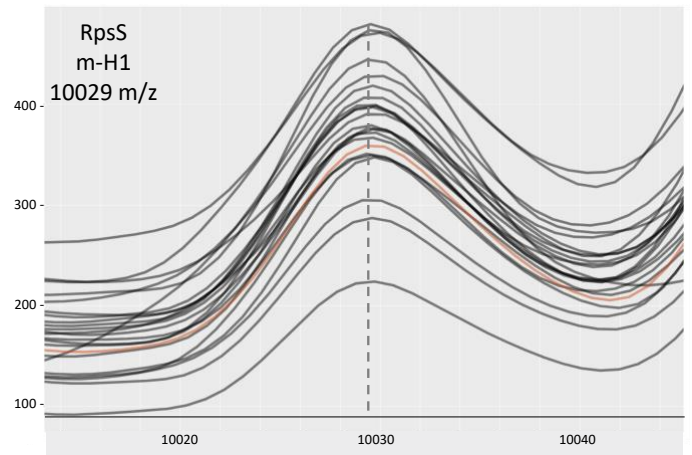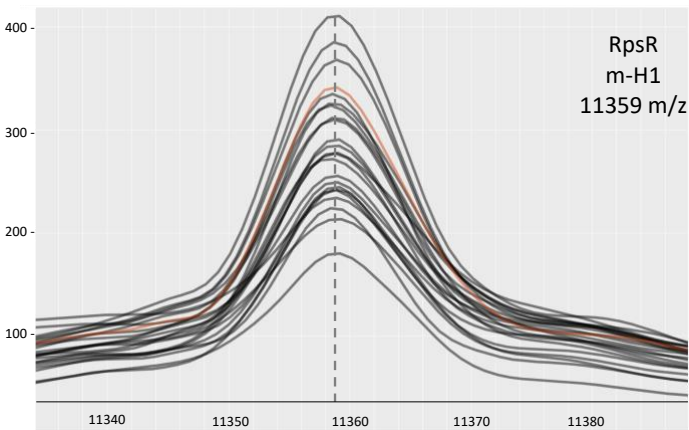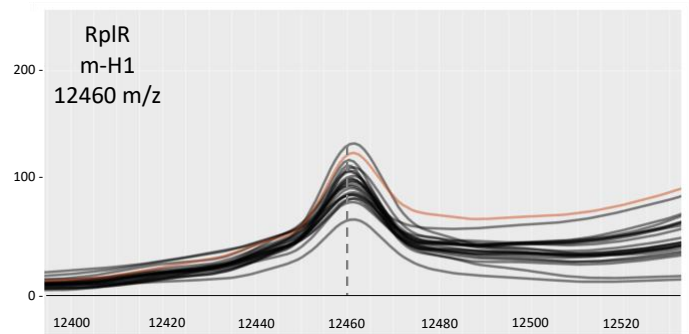

Supplement: MOESM7 [file 13567_2020_782_MOESM7_ESM.pdf]
