# Supplementary material for: Genetic diversity and population structure of Tenacibaculum maritimum, a serious bacterial pathogen of marine fish: from genome comparisons to high throughput MALDI-TOF typing
Source: Springer Nature journal article supplement (doi:10.1186/s13567-020-00782-0), 2020-05-07
Supplement: MOESM9 [file 13567_2020_782_MOESM9_ESM.pdf]

RpmD IF1 MSKIKVITQVRSQICRPFKNQKRTLEALGLRKMNQTVHEHATPSIVCMVNTVXHLISVEEVK 60  
RpmD IF2 MSKIKVITQVRSQIGRLKSQKRTLEALGLRKINQTVHEHATSTILGMVNVKQHLVSVEEIK 60  
RpmD IF3 MSKIKVITQVRSQIGRLKSQKRTLEALGLRKINQTVHEHATAITLGMVNVKQHLVSVEEIK 60

RpmC II MKQSEIKELSIADLQEQVLVKKNYTDLKMAHAITPLENPLQLKSLRRSVARIATELTKRELQ 63  
RpmC II L MKQSEIKELSIADLQEQVLVKKNYTDLKMAHAITPLENPLQLRSLRRSVARIATELTKRELQ 63  
RpmC IF3 MKQSEIKELSIADLQEQVLVKKNYTDLKMAHAITPLENPLQLKSLRRSVARIATELTKRELQ 63  
RpmC IF4 MKQSEIKELSIADLQEQVLVKKNYTDLKMAHAITPLENPLQLRSLRRSVARIVTELTKRELQ 63

RpsP IF1 MPVKIRLQRHGKKGKPFYVVAADSRAKRDRGFLEKICTYNPNTNPATIELDVDSAVKWLQNGAQPDTARALLSYKGALLKNHLAGGVRKALTEEQAAAKFEAWLEEKEGVS 115  
RpsP IF2 MPVKIRLQRHGKKGKPFYVVAADSRAKRDRGFLEKICTYNPNTNPATIELDVDSAVKWLQNGAQPDTARALLSYKGALLKNHLAGGVRKALTEEQAAAKFEAWLEEKEGVS 115  
RpsP IF3 MPVKIRLQRHGKKGKPFYVVAADSRAKRDRGFLEKICTYNPNTNPATIELDVDSAVKWLQNGAQPDTARALLSYKGALLKNHLAGGVRKALTEEQAAAKFEAWLEEKEGVS 115  
RpsP IF4 MPVKIRLQRHGKKGKPFYVVAADSRAKRDRGFLEKICTYNPNTNPATIELDVDSAVKWLQNGAQPDTARALLSYKGALLKNHLAGGVRKALTEEQAAAKFEAWLEEKEGVS 115  
RpsP IF5 MPVKIRLQRHGKKGKPFYVVAADSRAKRDRGFLEKICTYNPNTNPATIELDVDSAVKWLQNGAQPDTARALLSYKGALLKNHLAGGVRKALTEEQAAAKFEAWLEEKEGVS 115

RpsP IF1 TKEADLAKAKEAAKAKALEAEKAVNEARIAAAVPAVEEESATTEEAPAAAKSEE 171  
RpsP IF2 TKEADLAKAKEAAKAKALEAEKAVNEARIAAAVPAVEEESATTEEAPAAAKSEE 171  
RpsP IF3 TKEADLAKAKEAAKAKALEAEKAVNEARIAAAVPAVEEESATTEEAPAAAKSEE 171  
RpsP IF4 TKEADLAKAKEAAKAKALEAEKAVNEARIAAAVPAVEEESATTEEAPAAAKSEE 171  
RpsP IF5 TKEADLAKAKEAAKAKALEAEKAVNEARIAAAVPAVEEESATTEEAPAAAKSEE 171

RpsT IF1 MANHKSALKRIRSNKAKRLRNKYQHKTTRNAVRKLRAEDRKEAEGMFQSKVVSMLDKLAKNNIIHKNKASNLKSKLAKHVAAL 83  
RpsT IF2 MANHKSALKRIRSNKAKRLRNKYQHKTTRNAVRKLRAEDRKEAEGMFQSKVVSMLDKLAKNNIIHKNKASNLKSKLAKHVAAL 83

RpsN IF1 AKESMKARERKRAKTVAKFAEKRKALKEAGDYALQKLPKNASPIRMHNRCCLTGRPKGYMRQFGISRVTFREMANQGLIPGVTKASW 89  
RpsN IF2 AKESMKARERKRAKTVAKFAEKRKALKEAGDYALQKLPKNASPIRMHNRCCLTGRPKGYMRQFGISRVTFREMANQGLIPGVTKASW 89

RpsO IF1 MYLTKEVKEGIFEKHGKGNKNDTGTSEGGIALFTFRINHLTEHLKKNRKFDFNTERSLVKMVGKRRSLLDYLKKKIDINRYRAIIKELGIRK 89  
RpsO IF2 MYLTKEVKEGIFEKHGKGNKNDTGTSEGGIALFTFRINHLTEHLKKNRKFDFNTERSLVKMVGKRRSLLDYLKKKIDINRYRAIIKELGIRK 89

RpsQ IF1 MEKRNLRKERIGVSSNMKESIVVNEVKRVKHPMYGKFLVTKTKKYVAHDEKNDNCIGDVTFRIMETRPLSKSKRWRLVEILERAK 85  
RpsQ IF2 MEKRNLRKERIGVSSNMKESIVVSEVKRVKHPMYGKFLVTKTKKYVAHDEKNDNCIGDVTFRIMETRPLSKSKRWRLVEILERAK 85

Rp1X IF1 MQKFKIKSGDVTVKVIAGDHKSGEGVLRILKEKNRVVVEGVNMIKHTKPSAANPQGGIVKKEAPIHVSNLALVENGEAVRVGYRMEGDKKVRFSSKSDKAI 102  
Rp1X IF2 MQKFKIKSGDVTVKVIAGDHKSGEGVLRILKEKNRVVVEGVNMIKHTKPSAANPQGGIVKKEAPIHVSNLALVENGEAVRVGYRMEGDKKVRFSSKSDKAI 102

Rp1T IF1 MPRSVNSVASRRRKKILKQAKGYFGRKNVYTVAKNAVEKAMTYAYRDRKNNKRNFRSLWIQRINAGARQFGMSYSQFMGKVKANDIELNRKVLADLAMNPEAFKAVDKIK 114  
Rp1T IF2 MPRSVNSVASRRRKKILKQAKGYFGRKNVYTVAKNAVEKAMTYAYRDRKNNKRNFRSLWIQRINAGARQFGMSYSQFMGKVKANDIELNRKVLADLAMNPEAFKAVDKIK 114  
Rp1T IF3 MPRSVNSVASRRRKKILKQAKGYFGRKNVYTVAKNAVEKAMTYAYRDRKNNKRNFRSLWIQRINAGARQFGMSYSQFMGKVKANDIELNRKVLADLAMNPEAFKAVDKIK 114
